# Supplementary material for: Concerted regulation of non-alcoholic fatty liver disease progression by microRNAs in apolipoprotein E-deficient mice
Source: PubMed Central journal article supplement (PMC8713993; doi:10.1242/dmm.049173), 2021-12-24
Supplement: dmm-14-049173-s1.pdf [file dmm-14-049173-s1.pdf]

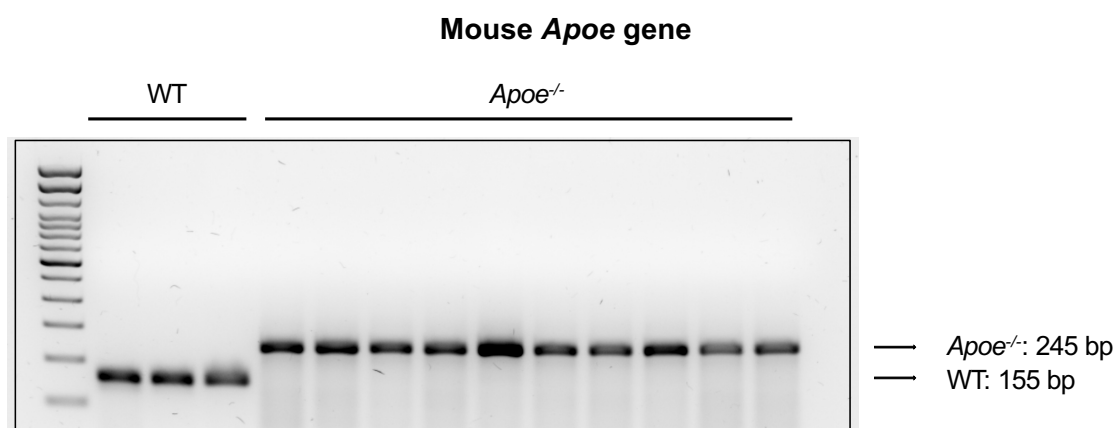

**Fig. S1. Genotype assessment of the mouse model.** DNA extracted from the tail of WT STD (n = 3) and *ApoE*<sup>-/-</sup> (n = 10) mice was used to perform the genetic characterization through PCR analysis. bp: Base pairs.

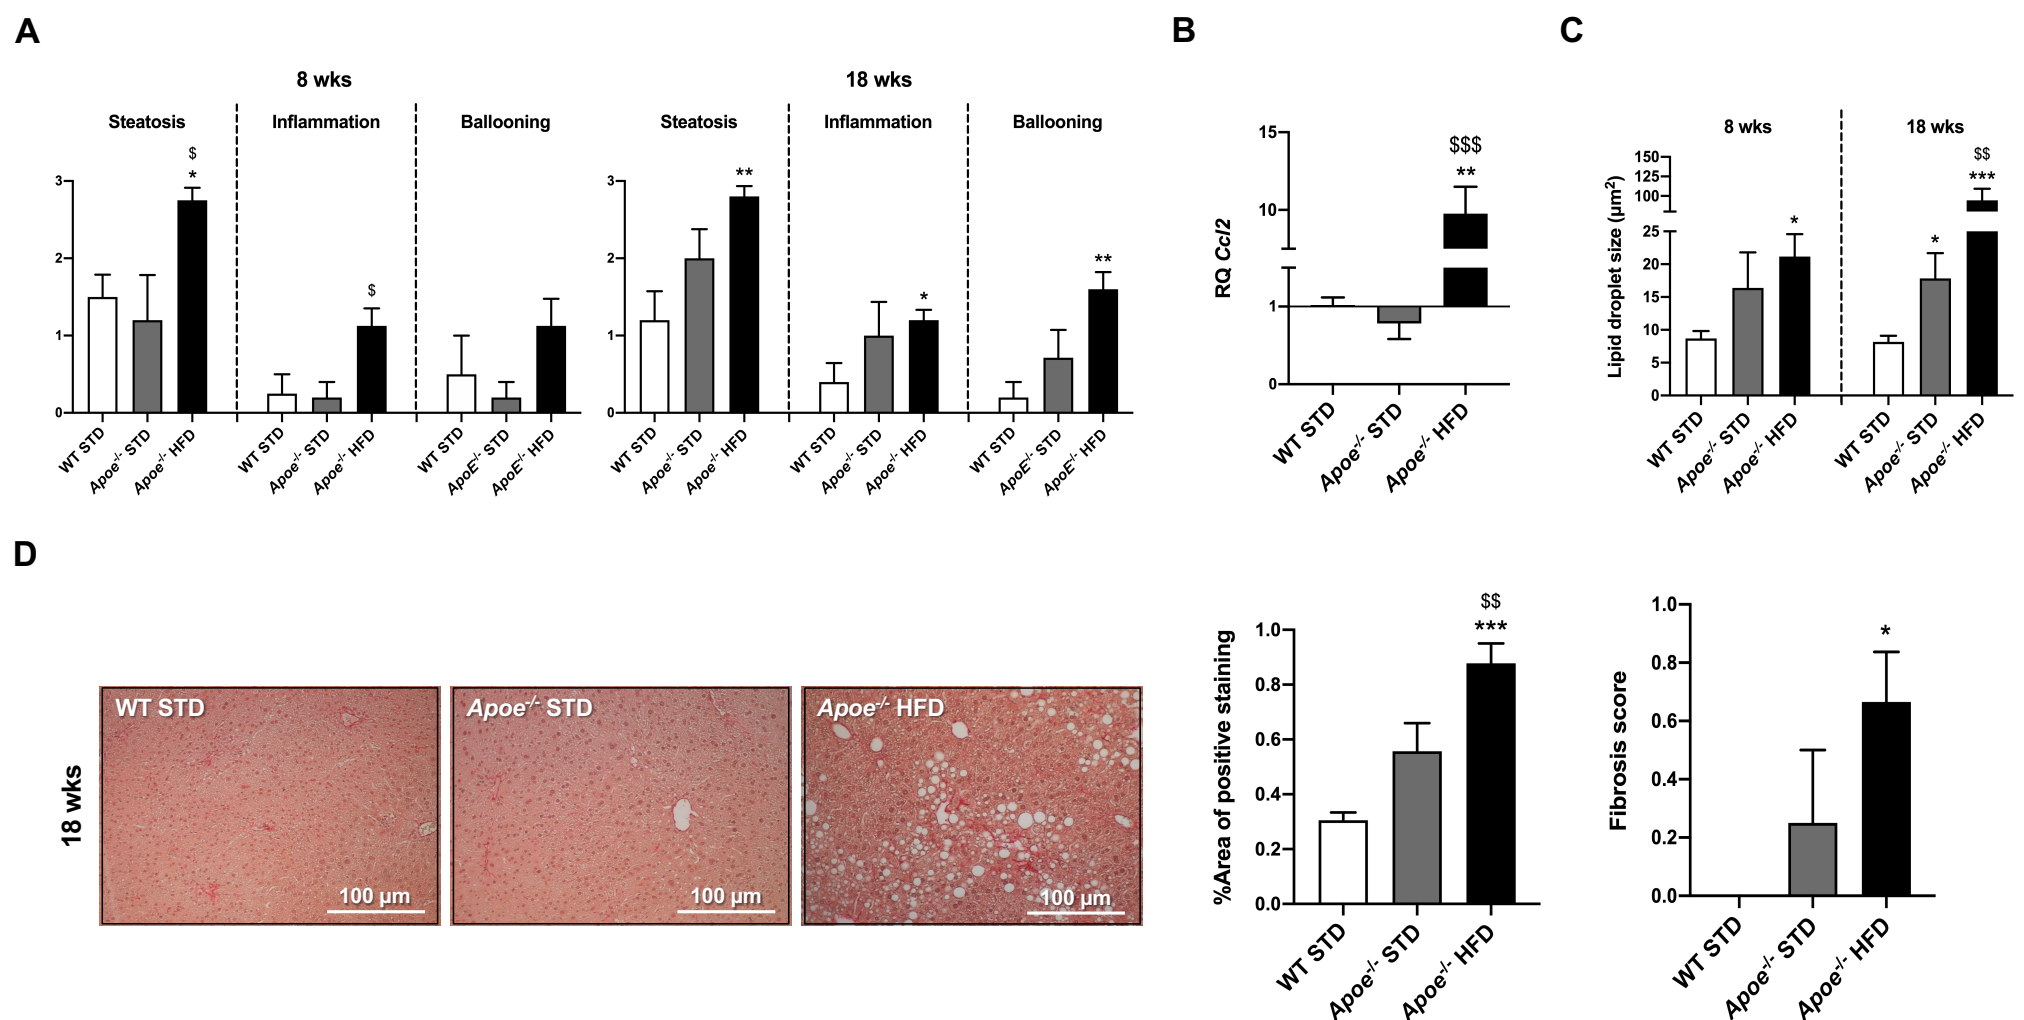

**Fig. S2. Histopathological analysis of NAFLD progression.** (A) The quantification of steatosis, inflammation and ballooning in WT STD (n = 4-5), *ApoE*<sup>-/-</sup> STD (n = 5-7) and *ApoE*<sup>-/-</sup> HFD (n = 8-10) mice after 8 (*left*) or 18 (*right*) weeks on diet. (B) mRNA levels of *Ccl2* by RT-qPCR in livers from WT STD (n = 5), *ApoE*<sup>-/-</sup> STD (n = 8) and *ApoE*<sup>-/-</sup> HFD (n = 11) mice fed on 18 weeks. *Gapdh* was used as a control. (C) Measurement of lipid droplet size (μm<sup>2</sup>) in WT STD (n = 5-6), *ApoE*<sup>-/-</sup> STD (n = 3-6) and *ApoE*<sup>-/-</sup> HFD (n = 8-9) mice fed for 8 or 18 weeks. (D) Representative images of Sirius Red staining to study hepatic fibrosis (image magnification: x10) and the quantification of positive area staining and fibrosis score in WT STD (n = 4), *ApoE*<sup>-/-</sup> STD (n = 4) and *ApoE*<sup>-/-</sup> HFD (n = 6-12) mice after 18 weeks on diet. Results are expressed as mean ± SEM. Statistical significance was assessed by two-tailed unpaired Student's *t*-test with the exception of Sirius Red positive area and fibrosis score data which were evaluated by unpaired non-parametric Mann-Whitney U test and it was represented as \* (p < 0.05), \*\* (p < 0.01) and \*\*\* (p < 0.001) vs. WT STD mice; \$ (p < 0.05), \$\$ (p < 0.01) and \$\$\$ (p < 0.001) vs. *ApoE*<sup>-/-</sup> STD mice.

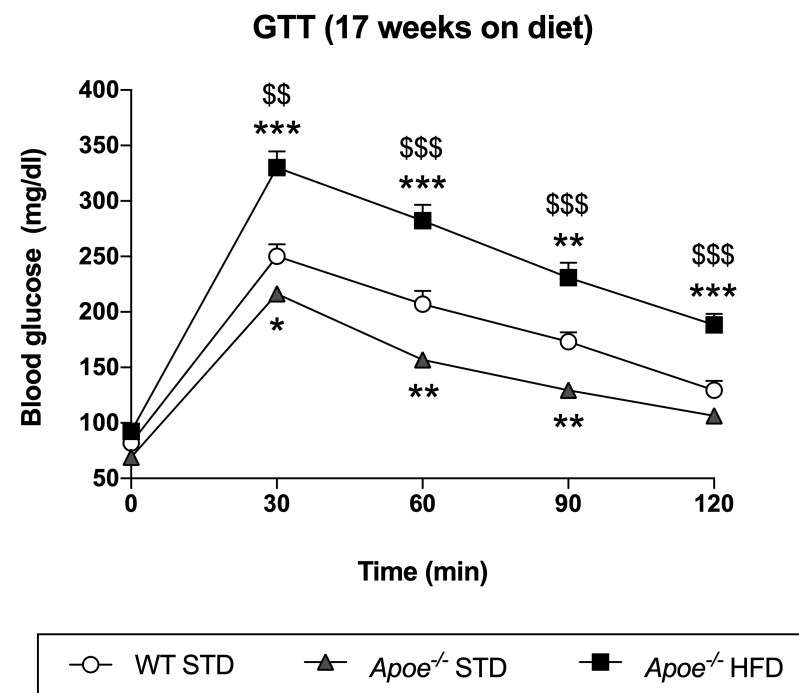

**Fig. S3. Glucose tolerance is also altered in mice with liver injury.** GTT in WT STD (n = 7), *Apoe*<sup>-/-</sup> STD (n = 5-6) and *Apoe*<sup>-/-</sup> HFD (n = 7) animals after 17 weeks on diet. Results are expressed as mean ± SEM. Statistical significance was assessed by two-tailed unpaired Student's *t*-test and it was represented as \* (p < 0.05), \*\* (p < 0.01) and \*\*\* (p < 0.001) vs. WT STD mice; \$\$ (p < 0.01) and \$\$\$ (p < 0.001) vs. *Apoe*<sup>-/-</sup> STD mice.

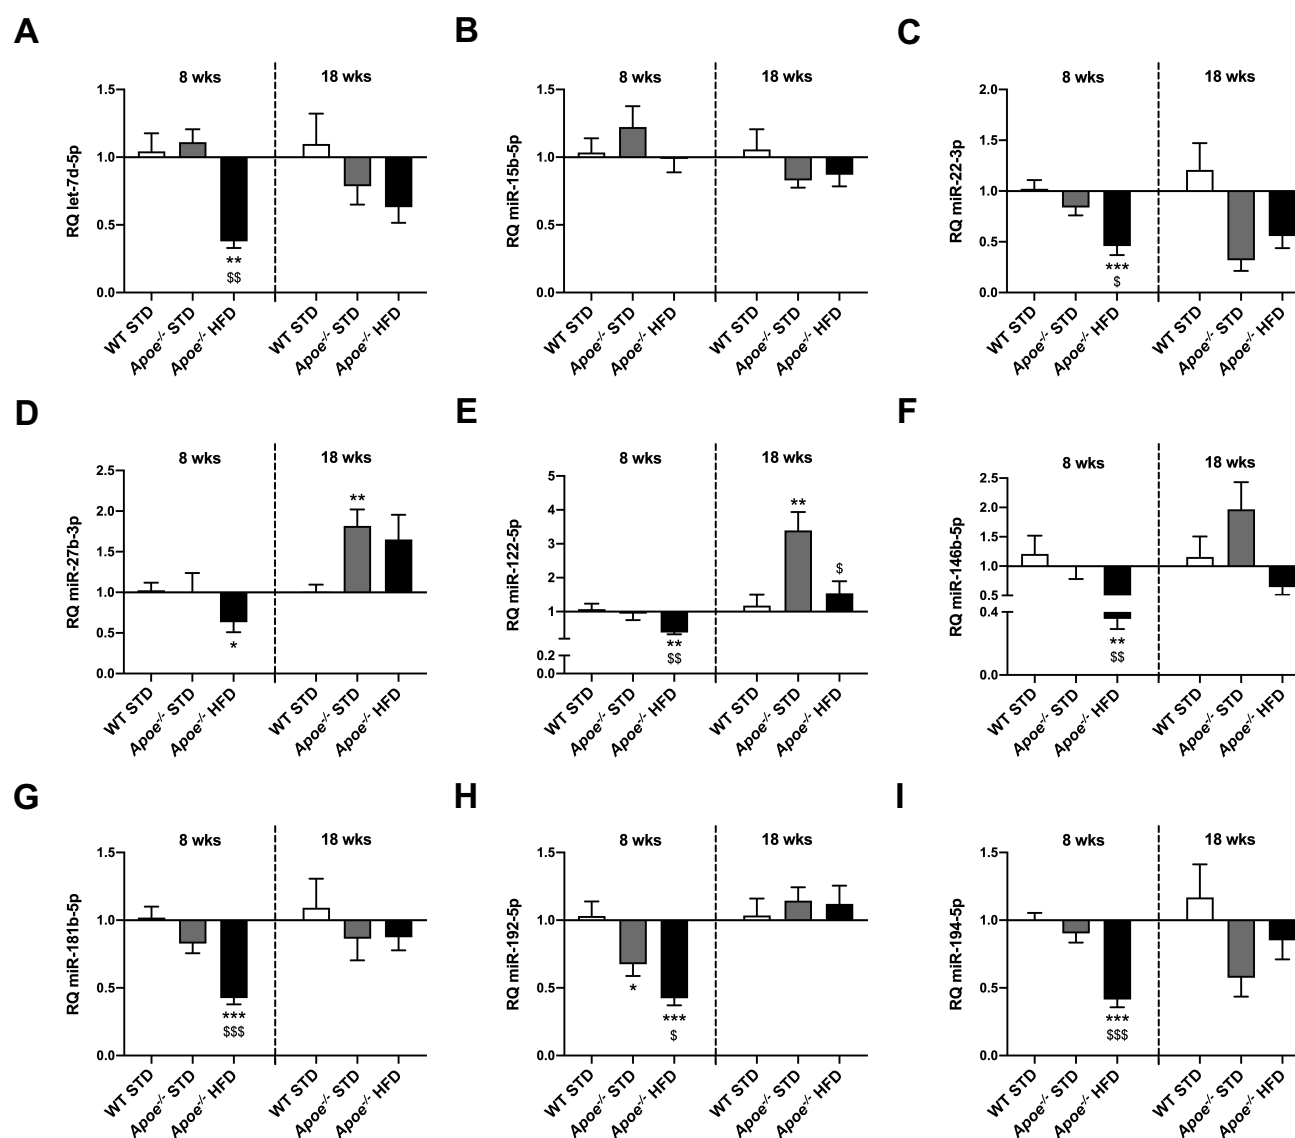

**Fig. S4. miRNA expression study through RT-qPCR in the liver.** Level comparison of: (A) let-7d-5p, (B) miR-15b-5p, (C) miR-22-3p, (D) miR-27b-3p (E) miR-122-5p, (F) miR-146b-5p, (G) miR-181b-5p, (H) miR-192-5p and (I) miR-194-5p in livers from WT STD (n = 5-7), *Apoe*<sup>-/-</sup> STD (n = 4-9) and *Apoe*<sup>-/-</sup> HFD (n = 6-10) mice fed 8 or 18 weeks on diet. miR-191-5p was used as a control. Results are expressed as mean  $\pm$  SEM. Normality test determined 8-week of diet data as normal, except for RQ let-7d-5p, and 18-week of diet data as no normal with the exception of RQ let-7d-5p, miR-15b-5p, miR-22-3p, miR-181b-5p and miR-194-5p. For that reason, statistical significance was assessed by two-tailed unpaired Student's *t*-test in the case of normal data and no normal data were evaluated by unpaired non-parametric Mann-Whitney U test, and it was represented as \* ( $p < 0.05$ ), \*\* ( $p < 0.01$ ) and \*\*\* ( $p < 0.001$ ) vs. WT STD mice; \$ ( $p < 0.05$ ), \$\$ ( $p < 0.01$ ) and \$\$\$ ( $p < 0.001$ ) vs. *Apoe*<sup>-/-</sup> STD mice.

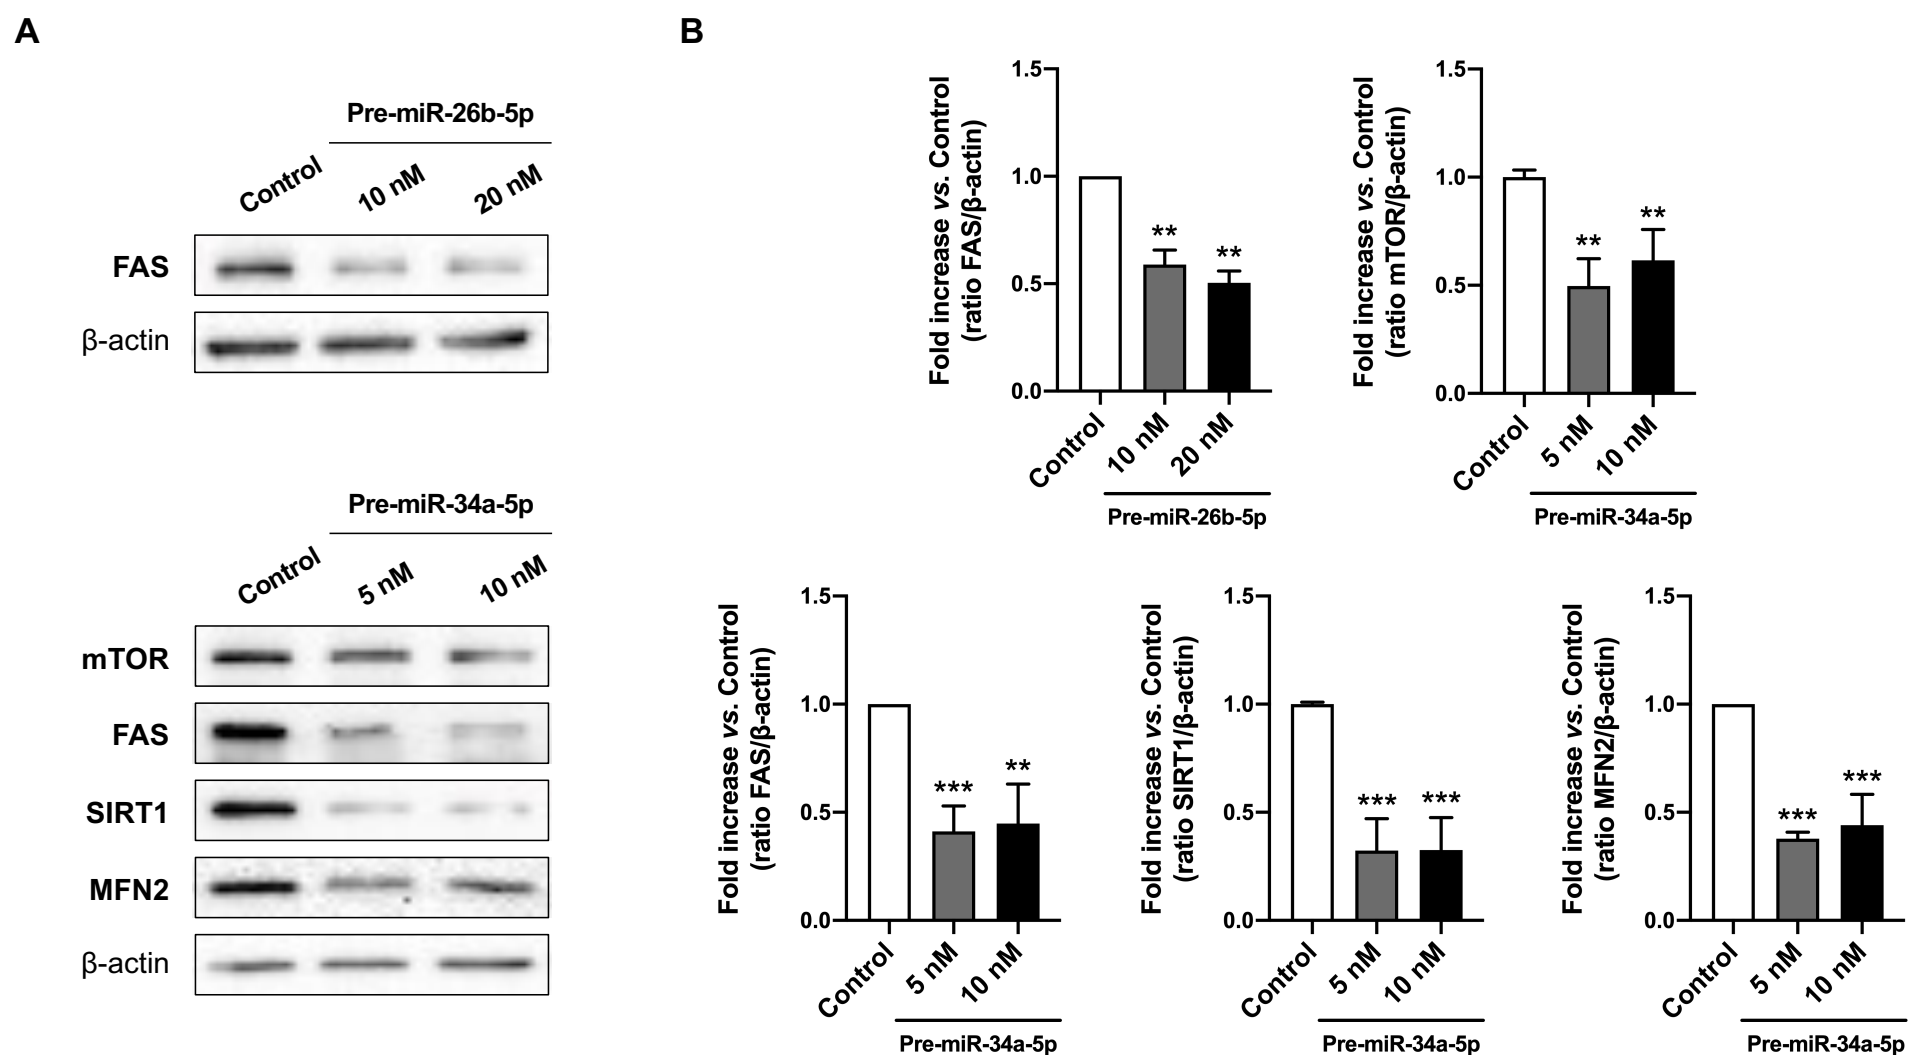

**Fig. S5. *In vitro* overexpression of miR-26b-5p and miR-34a-5p induces the downregulation of some of their predicted targets.**

(A) Representative gels of western blot analysis of mTOR, FAS, SIRT1 and MFN2 in Huh7 cell lysates after miR-26b-5p and miR-34a-5p overexpression.  $\beta$ -actin was used as a loading control. (B) Histograms showing the protein/ $\beta$ -actin ratio quantification of band intensities in Control and transfected cells (Pre-miR-26b-5p and Pre-miR-34a-5p). At least, three technical replicates were performed. Results are expressed as mean  $\pm$  SEM. Statistical significance was assessed by two-tailed unpaired Student's t-test with the exception of mTOR and FAS data which were evaluated by unpaired non-parametric Mann-Whitney U test and it was represented as \*\* ( $p < 0.01$ ) and \*\*\* ( $p < 0.001$ ) vs. Control cells.



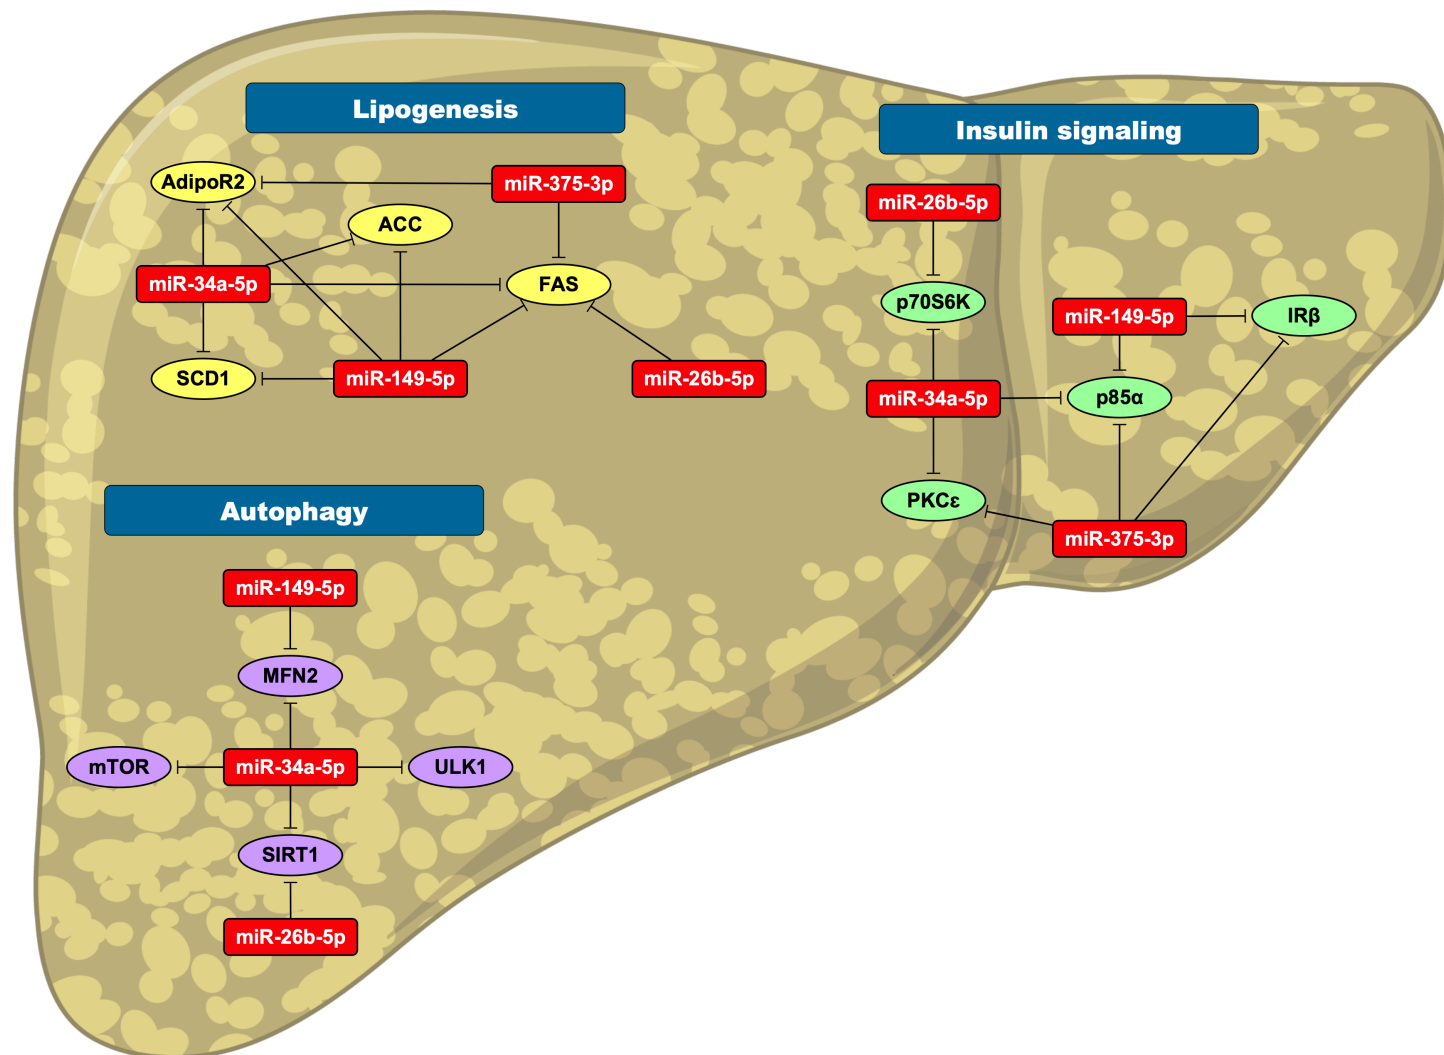

**Fig. S6. Summary of miRNA-target interactions involved in NAFLD progression.** The diagram displays the potential interactions of miR-26b-5p, miR-34a-5p, miR-149-5p and miR-375-5p with their targets regarding lipid metabolism, insulin signaling and autophagy.

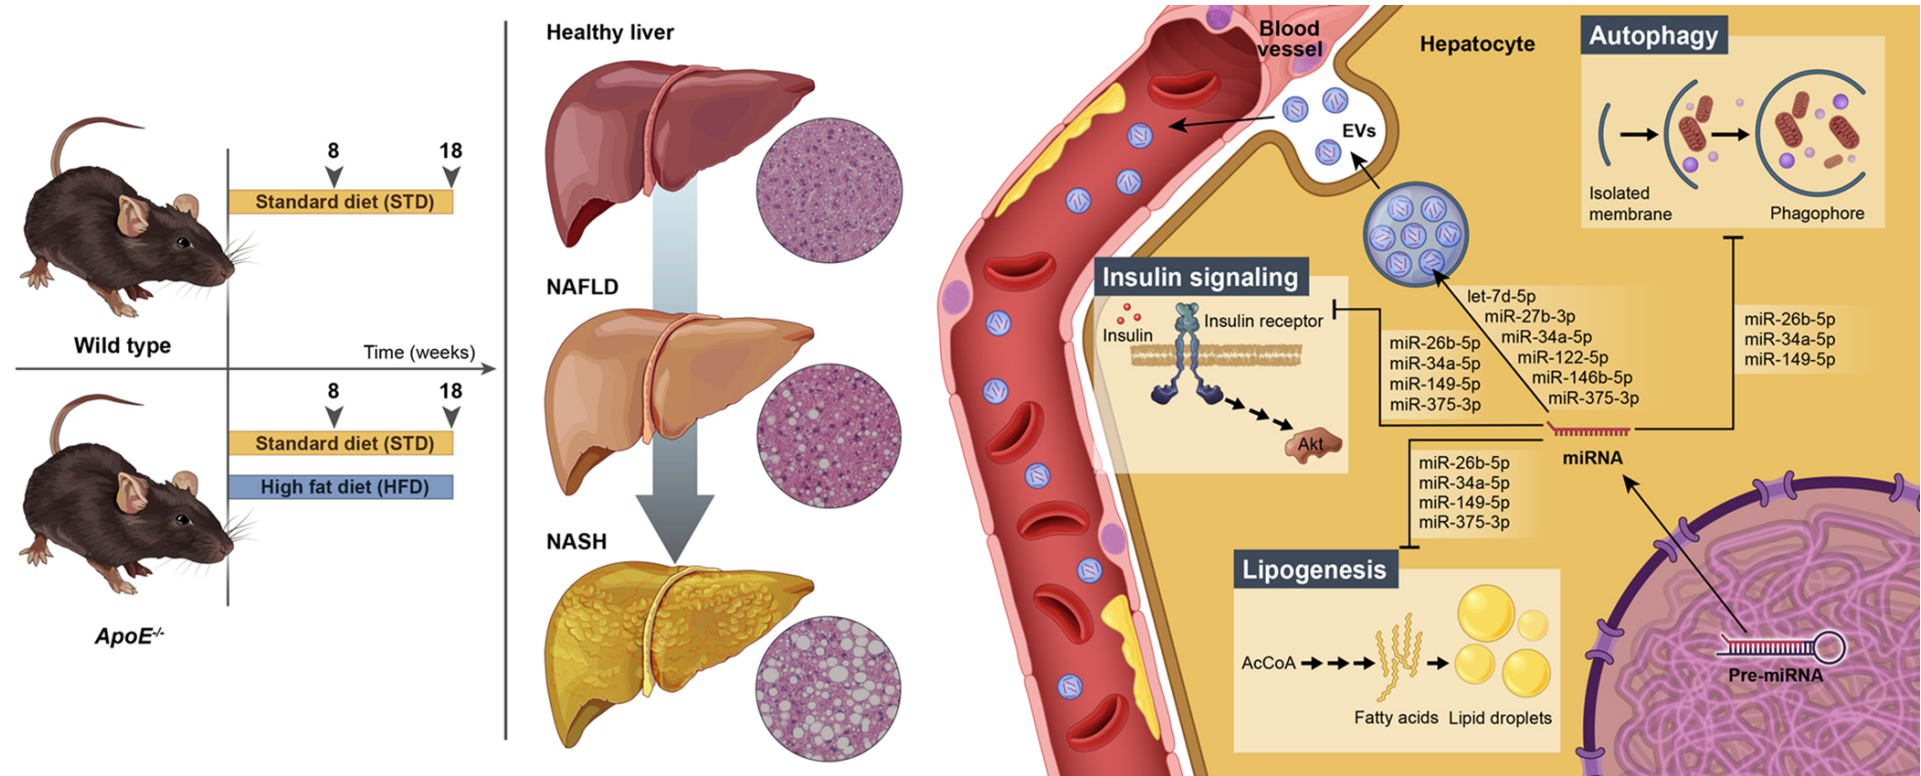

**Fig. S7. Schematic representation of the main features of NAFLD in the *ApoE*<sup>-/-</sup> mouse model.** This graph highlights the noticeable histological differences between experimental groups and the selected miRNAs as regulators of disease development and potential biomarkers for its diagnosis.

**Table S1. RT-qPCR primers sequence for gene expression.** Fwd.: Forward; Rev.: Reverse.

| <b>Target gene</b>                    | <b>Primer sequence</b>                                                       |
|---------------------------------------|------------------------------------------------------------------------------|
| <b><i>Acaca</i> (NM_133360.2)</b>     | Fwd.: 5'-GAATCTCCTGGTGACAATGCTTATT-3'<br>Rev.: 5'-GGTCTTGCTGAGTTGGGTTAGCT-3' |
| <b><i>Actb</i> (NM_007393)</b>        | Fwd.: 5'-GACATGGAGAAGATCTGGCA-3'<br>Rev.: 5'-GGTCTCAAACATGATCTGGGT-3'        |
| <b><i>Adipor2</i> (NM_197985.4)</b>   | Fwd.: 5'-TCTCAGTGGGACATGTTTGC-3'<br>Rev.: 5'-AGGCCTAAGCCCACGAAC-3'           |
| <b><i>Cd36</i> (NM_001159555.1)</b>   | Fwd.: 5'-AGATGACGTGGCAAAGAACAG-3'<br>Rev.: 5'-CCTTGGCTAGATAACGAACTCTG-3'     |
| <b><i>Fasn</i> (NM_007988.3)</b>      | Fwd.: 5'-TCGGCGGGTCTATGCCACGA-3'<br>Rev.: 5'-GTCACCCACCTTGGTGCCCG-3'         |
| <b><i>Ppargc1a</i> (NM_008904.2)</b>  | Fwd.: 5'-TCGCTGATGCACTGCCTATG-3'<br>Rev.: 5'-GAGAGGTCCACAGAGCTGATT-3'        |
| <b><i>Scd1</i> (NM_009127.4)</b>      | Fwd.: 5'-TTCTTGCGATACTCTGGTGC-3'<br>Rev.: 5'-CGGGATTGAATGTTCTTGTCGT-3'       |
| <b><i>Srebf1</i> (NM_001358314.1)</b> | Fwd.: 5'-CACTGGTCGTAGATGCGGAGAA-3'<br>Rev.: 5'-TCATTGATGGAGGAGCGGTAGC-3'     |

**Table S2. TaqMan probes used for RT-qPCR analyses.**

| Target gene     | Reference     |
|-----------------|---------------|
| <i>Ccl2</i>     | Mm00441242_m1 |
| <i>Gapdh</i>    | Mm03302249_g1 |
| mmu-let-7d-5p   | mmu478439_mir |
| mmu-miR-15b-5p  | mmu482957_mir |
| mmu-miR-16b-5p  | mmu482960_mir |
| mmu-miR-22-3p   | mmu481004_mir |
| mmu-miR-26b-5p  | mmu482965_mir |
| mmu-miR-27b-3p  | mmu478270_mir |
| mmu-miR-34a-5p  | mmu481304_mir |
| mmu-miR-122-5p  | mmu480899_mir |
| mmu-miR-146b-5p | mmu478513_mir |
| mmu-miR-149-5p  | mmu480946_mir |
| mmu-miR-181b-5p | mmu478583_mir |
| mmu-miR-191-5p  | mmu481584_mir |
| mmu-miR-192-5p  | mmu480876_mir |
| mmu-miR-194-5p  | mmu480976_mir |
| mmu-miR-375-5p  | mmu481141_mir |

**Table S3. List of primary antibodies used for Western blot analysis.**

| Antibody                 | Host   | Dilution                                          | Reference | Supplier                                        |                                          |
|--------------------------|--------|---------------------------------------------------|-----------|-------------------------------------------------|------------------------------------------|
| CD63 (EPR5702)           | Rabbit | 1:1000                                            | ab134045  | Abcam<br>(Cambridge, UK)                        |                                          |
| MFN2                     | Mouse  | 1:1000 (liver extracts) // 1:5000 (cell lysates)  | ab56889   |                                                 |                                          |
| ACC                      | Rabbit | 1:1000                                            | #3662     | Cell Signaling Technology<br>(Danvers, MA, USA) |                                          |
| AKT                      | Rabbit | 1:1000                                            | #9272     |                                                 |                                          |
| CD81 (D502Q)             | Rabbit | 1:1000                                            | #10037    |                                                 |                                          |
| FAS                      | Rabbit | 1:1000 (liver extracts) // 1:5000 (cell lysates)  | #3180     |                                                 |                                          |
| GM130 (D6B1)             | Rabbit | 1:1000                                            | #12480    |                                                 |                                          |
| mTOR (7C10)              | Rabbit | 1:1000                                            | #2983     |                                                 |                                          |
| LC3A/B                   | Rabbit | 1:1000                                            | #4108     |                                                 |                                          |
| p-AKT (Ser473) (193H12)  | Rabbit | 1:1000                                            | #4058     |                                                 |                                          |
| p-AKT (Thr308) (D25E6)   | Rabbit | 1:1000                                            | #9275     |                                                 |                                          |
| p-ULK1 (Ser757) (D70U6)  | Rabbit | 1:1000                                            | #1402     |                                                 |                                          |
| PKC $\epsilon$ (22B10)   | Rabbit | 1:1000                                            | #2683     |                                                 |                                          |
| SCD1 (C12H5)             | Rabbit | 1:1000                                            | #2794     |                                                 |                                          |
| PI3 Kinase p85 $\alpha$  | Rabbit | 1:1000                                            | ABS234    |                                                 | Merck Millipore<br>(Burlington, MA, USA) |
| SIRT1                    | Rabbit | 1:1000 (liver extracts) // 1:2000 (cell lysates)  | #07-131   |                                                 |                                          |
| IR $\beta$ (C-19)        | Rabbit | 1:1000                                            | sc-711    | Santa Cruz Biotechnology<br>(Dallas, TX, USA)   |                                          |
| $\alpha$ -tubulin (DM1A) | Mouse  | 1:1000                                            | T6199     | Sigma-Aldrich<br>(St. Louis, MO, USA)           |                                          |
| $\beta$ -actin           | Mouse  | 1:5000 (liver extracts) // 1:10000 (cell lysates) | A5441     |                                                 |                                          |
